# Supplementary material for: Applying the Behaviour Change Wheel to UK Local Authority Policy Documents: A Content Analysis in the Context of Financial Behaviour
Source: MDPI journal article supplement (doi:10.3390/bs13120991), 2023-11-30
Supplement: s1 [file s1]

## Appendix 1

Figure S1: Search strategy

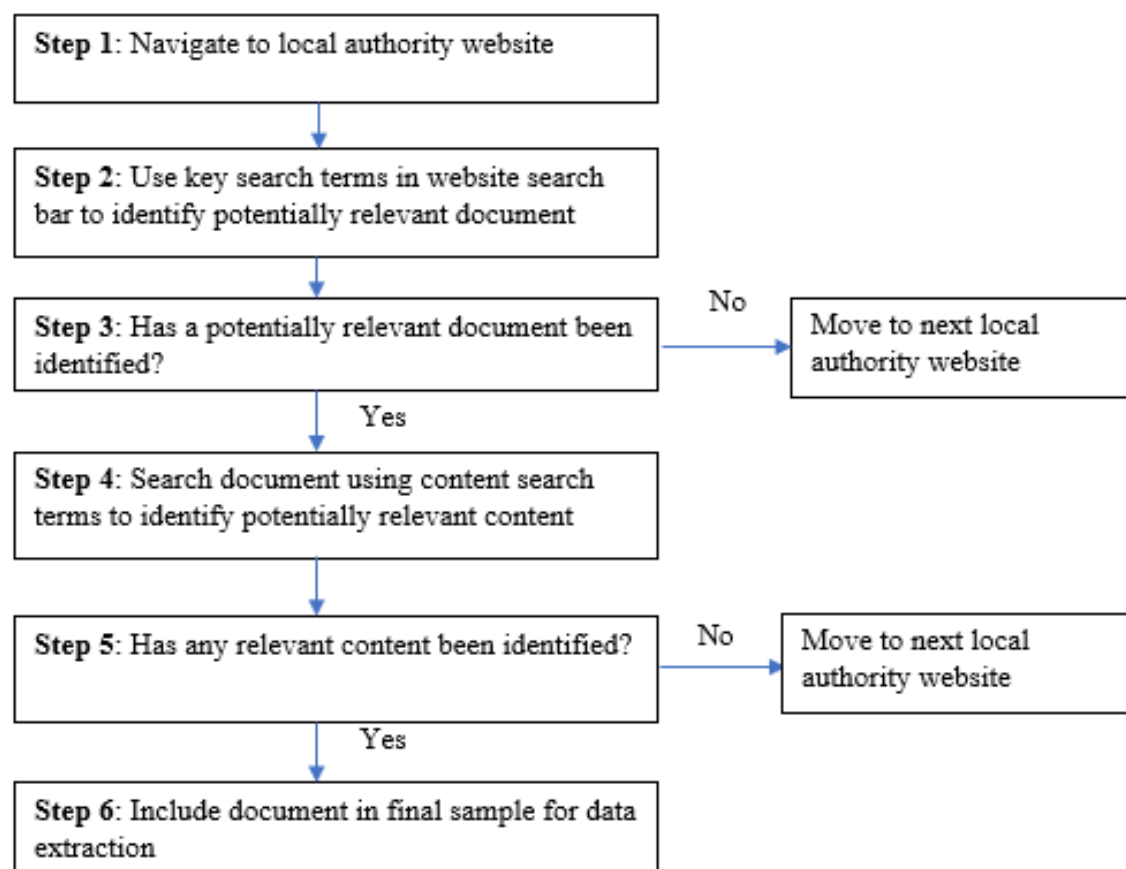

## Appendix 2

**Table S1: A sample of the coding form used and explanations for each criteria**

[illegible]

### Appendix 3

**Table S2: Assessment of the common Action words within the documents**

| Action word | Relevant dictionary definition (Oxford English Dictionary, 2022)                                                                                                                                                                                                                                                                                                | Assessment of discrete                                                                                                 | Assessment of observable                                                                        |
|-------------|-----------------------------------------------------------------------------------------------------------------------------------------------------------------------------------------------------------------------------------------------------------------------------------------------------------------------------------------------------------------|------------------------------------------------------------------------------------------------------------------------|-------------------------------------------------------------------------------------------------|
| Save        | To keep and store up instead of spending or using, esp. over time; (chiefly) spec. to accumulate (money) by regularly setting aside a portion of one's income, now typically by depositing sums in a bank or building society account, purchasing savings certificates, etc.                                                                                    | Possibly – this would depend if there was any additional information given on how and what the person might be saving. | Yes – this could be an observable Action in the context of saving money.                        |
| Claim       | To demand as one's own or one's due; to seek or ask for on the ground of right.<br><br>To make a claim for (indemnity), esp. upon an insurance company.<br><br>To assert and demand recognition of (an alleged right, title, possession, attribute, acquirement, or the like); to assert as one's own, to affirm one's possession of.                           | No – not discrete as likely to take multiple successive Actions (all definitions)                                      | Possibly- could be observable but depends on the specific Action or outcome (all definitions)   |
| Complete    | To bring to an end, finish (an Action, performance, work, a distance, period of time, etc.).                                                                                                                                                                                                                                                                    | No – not discrete as likely to take multiple successive Actions.                                                       | No – Unlikely to be observable.                                                                 |
| Apply       | To make an approach to (a person) for information or aid; to have recourse or make application to, to appeal to; to make a (formal) request for.<br><br>To put oneself forward formally as a candidate for a position, esp. in a recruitment or selection process; to submit an application to do something, for a job or other position, or to an institution. | No – not discrete as likely to take multiple successive Actions. (all definitions)                                     | Possibly – could be observable but depends on the specific Action or outcome. (all definitions) |

| Action word | Relevant dictionary definition (Oxford English Dictionary, 2022)                                                                                                                                                                                                                                                                                                                                                                                                                            | Assessment of discrete                                                                                                                                                                                | Assessment of observable                                                                                    |
|-------------|---------------------------------------------------------------------------------------------------------------------------------------------------------------------------------------------------------------------------------------------------------------------------------------------------------------------------------------------------------------------------------------------------------------------------------------------------------------------------------------------|-------------------------------------------------------------------------------------------------------------------------------------------------------------------------------------------------------|-------------------------------------------------------------------------------------------------------------|
| Search      | <p>To look for or seek (someone or something); to make efforts to find or discover.</p> <p>An act or instance of searching for information, images, etc., on a digital database or the internet, esp. by entering a particular string of words or characters into a search engine. Also: the systematic retrieval of information of this kind; the facility for this.</p>                                                                                                                   | <p>Possibly – Could be discrete (e.g. searching on an online search engine) but would depend if enough information was given to how and what the searches would be carried out. (all definitions)</p> | <p>Possibly – Could be observable but would depend on the specific Action or outcome. (all definitions)</p> |
| Take up     | <p>The number of people accepting or claiming something offered, esp. state benefits.</p>                                                                                                                                                                                                                                                                                                                                                                                                   | <p>No – not discrete as likely to take multiple successive Actions.</p>                                                                                                                               | <p>No – unlikely to be observable.</p>                                                                      |
| Pay         | <p>To give, transfer, or hand over (money, or its equivalent) in return for goods or services, or in discharge of an obligation; to deliver (a sum or amount owed).</p> <p>To give to (a person, organization, etc.) money that is due for goods received, a service done, a debt or obligation incurred, etc.; to remunerate.</p>                                                                                                                                                          | <p>Possibly – Could be discrete but would need more information on how and what is being paid. (all definitions)</p>                                                                                  | <p>Possibly – this could be an observable Action. (all definitions)</p>                                     |
| Request     | <p>To ask (a person), esp. in a polite or formal manner, to do something.</p> <p>An instance of asking for something, esp. in a polite or formal manner; a petition or expression of wish; a document expressing such a wish; (also) the thing which is asked for.</p> <p>The Action, on the part of a specified person, of asking for some favour, service, etc., from another; the expression of one's desire or wish directly addressed to the person or persons able to gratify it.</p> | <p>Possibly – Could be discrete but would need more information on how and what is being requested. (all definitions)</p>                                                                             | <p>Possibly – this could be an observable Action. (all definitions)</p>                                     |
| Contact     | <p>To get into contact or in touch with (a person).</p>                                                                                                                                                                                                                                                                                                                                                                                                                                     | <p>No – this is not discrete as it is likely to take multiple successive Actions.</p>                                                                                                                 | <p>Possibly – this could be an observable</p>                                                               |

## **Appendix 4**

### **File S1: Instructions for coding Behaviour Change Techniques (BCTs)**

#### ***Instructions***

- Select the most appropriate BCTs from the BCT Taxonomy v1, (Michie et al. 2013).
- Only code BCTs that are applied to residents.
- Select the relevant BCTs from the drop down list within the Excel cell.

#### ***Hints and tips***

- It is possible that when an intervention has been specified it will not be described in enough detail to code a BCT. Indicate “No” in the column “Is the intervention able to be categorised using BCTTv1?” if this is the case.
- If you coded an intervention under a particular IT then use this as a guide to narrow the search for potentially relevant BCTs. For example, if you coded an intervention as Education, start by looking at the information and feedback based BCTs.

## Appendix 5

**Table S3: A list of the themes of coding discrepancies, and individual examples, that were referred to the third coder**

| Theme                                      | Data fragment                                                                                                                                                                                                          | 1 <sup>st</sup> coder (ZM)                         | 2 <sup>nd</sup> coder (KW)             | 3 <sup>rd</sup> coder (DD)<br>comments                                                                                     | Outcome                                                              |
|--------------------------------------------|------------------------------------------------------------------------------------------------------------------------------------------------------------------------------------------------------------------------|----------------------------------------------------|----------------------------------------|----------------------------------------------------------------------------------------------------------------------------|----------------------------------------------------------------------|
| When to code for persuasion?               | “Promote the Council’s Digital Equipment Recycling Scheme (Digital Blackpool) to encourage the uptake of loans for repurposed council laptops and portable routers”- Blackpool, Financial Inclusion Strategy           | Education                                          | Persuasion                             | Agree with the first coder. Not enough detail to code for Persuasion.                                                      | Kept the first coder’s initial codes. No amendments to the codebook. |
|                                            | “Develop an awareness campaign to build awareness about the importance of financial management” Blackpool, Financial Inclusion Strategy                                                                                | Education,                                         | Education, Persuasion                  | Agree with the first coder. Not enough detail to code for Persuasion.                                                      | As above                                                             |
| Environmental restructuring vs Enablement? | “Providing a dedicated Advice Hub in the Council’s Customer Service Centre to provide space for organisations offering debt, benefits and financial advice to low income residents” – Cambridge, Anti-Poverty Strategy | Environmental restructuring, Education, Enablement | Environmental restructuring, Education | Questioned which part of the intervention description would go above and beyond education and environmental restructuring. | Removed code for enablement for this fragment and any other similar. |

| Theme                                                                    | Data fragment                                                                                                                                                                                                             | 1 <sup>st</sup> coder (ZM)                  | 2 <sup>nd</sup> coder (KW)                                                                                                      | 3 <sup>rd</sup> coder (DD)<br>comments                                                | Outcome                                                                                                                                                          |
|--------------------------------------------------------------------------|---------------------------------------------------------------------------------------------------------------------------------------------------------------------------------------------------------------------------|---------------------------------------------|---------------------------------------------------------------------------------------------------------------------------------|---------------------------------------------------------------------------------------|------------------------------------------------------------------------------------------------------------------------------------------------------------------|
|                                                                          | “Tenants will be offered help and advice on welfare benefits and assistance in completing their housing benefit / universal credit application” – Mansfield, Rent Arrears Policy                                          | Education, Enablement                       | N/A [this fragment was not included in the reliability coding but was submitted to third coded as an example of a common issue] |                                                                                       | Kept the enablement code for this fragment as the assistance with completing application forms is a clear sign of enablement and is not covered by the education |
| When to code for “4.1 Instructions on how to perform the behaviour” BCT? | “Work with training centres and local schools to provide financial awareness training and build financial management skills for when they leave education and enter employment” - Blackpool, Financial Inclusion Strategy | No BCT code                                 | Instruction on how to perform the behaviour, Social Support (practical)                                                         | Agreed with the first coder, not enough detail to code a BCT.                         | Kept 1 <sup>st</sup> coders code. No update to the codebook.                                                                                                     |
|                                                                          | “Deliver and promote digital skills training to residents, to teach residents how to: Search for discounts, Search for financial information and advice....” - Blackpool, Financial Inclusion Strategy                    | Instruction on how to perform the behaviour | Instruction on how to perform the behaviour, Social Support (practical)                                                         | Agreed that the Instructions on how to perform the behaviour BCT should be coded here | As above                                                                                                                                                         |
| When to code for Social Support (practical) BCT?                         | “Provide and promote debt and budgeting advice to help people avoid getting into problem debt in the first place and to assist those who are” - Blackpool, Financial Inclusion Strategy                                   | Social support (practical)                  | No BCT code                                                                                                                     | Thought this fragment was more about informing than providing support.                | Social Support (practical) code was removed for this fragment.                                                                                                   |

| Theme                                                 | Data fragment                                                                                                                                                                                                                  | 1 <sup>st</sup> coder (ZM)                   | 2 <sup>nd</sup> coder (KW) | 3 <sup>rd</sup> coder (DD)<br>comments                                                  | Outcome                                                         |
|-------------------------------------------------------|--------------------------------------------------------------------------------------------------------------------------------------------------------------------------------------------------------------------------------|----------------------------------------------|----------------------------|-----------------------------------------------------------------------------------------|-----------------------------------------------------------------|
|                                                       | “Employing a Financial Inclusion Officer to support Council tenants and other low income residents in financial crisis to access financial support, benefits and budgeting and debt advice” - Cambridge, Anti-Poverty Strategy | Social Support (practical)                   | No BCT code                | Agreed with the Social Support (practical) code.                                        | Stuck with the first coder’s code. No updates to the code book. |
| Would a Physical capability barrier ever be relevant? | “People on low incomes are less likely to able to afford internet access, which can make it difficult to apply for Universal credit and other benefits, access cheaper utility deals,” - Cambridge, Anti-Poverty Strategy      | Physical Opportunity,<br>Physical Capability | Physical Opportunity       | Physical capability is only relevant to musculoskeletal functioning and physical skill. | Removed physical capability code.                               |



## Appendix 6

**Table S4: A list of all the documents included in the final sample**

| <b>Local Authority</b>             | <b>Name of document</b>            | <b>Year/s</b> |
|------------------------------------|------------------------------------|---------------|
| Blackpool                          | Financial Inclusion Strategy       | 2022-27       |
| Bournemouth Christchurch and Poole | Debt Management Policy             | 2022          |
| Cambridge                          | Anti-Poverty Strategy              | 2020-23       |
| Dacorum                            | Housing Income Management Strategy | 2018-22       |
| Dartford                           | Rent Arrears Policy                | 2022          |
| Daventry                           | Anti-Poverty Strategy              | 2022-25       |
| East Devon                         | Poverty Reduction Strategy         | 2021-24       |
| East Devon                         | Income Management Strategy         | 2022          |
| East Riding of Yorkshire           | Financial Inclusion Strategy       | 2019-23       |
| Hinckley and Bosworth              | Rent Arrears and Recovery Policy   | 2022          |
| Maidstone                          | Financial Inclusion Strategy       | 2021-26       |
| Mansfield                          | Rent Arrears Policy                | n/a           |
| Medway                             | Rent Arrears Recovery Policy       | 2020-22       |
| Norwich                            | Non-Commercial Debt Policy         | n/a           |
| Plymouth                           | Child Poverty Action Plan          | 2019-2022     |
| Runnymede                          | Financial Wellbeing Strategy       | 2022-2027     |
| Thanet                             | Income Management Policy           | n/a           |
| Uttlesford                         | Rent Arrears Policy                | n/a           |
| Wealden                            | Financial Inclusion Strategy       | 2020-2023     |
| Welwyn Hatfield                    | Rent Arrears Policy                | n/a           |
| West Lancashire                    | Financial Inclusion Strategy       | 2021-24       |
| Wokingham                          | Anti-Poverty Strategy              | 2022-26       |

## Appendix 7

**Table S5: Data fragments that did and did not meet the extraction criteria**

| <b>Data fragment</b>                                                                                                                                                     | <b>Strategy</b>                                        | <b>Does it meet extraction criteria for any RQ?</b> | <b>Rationale</b>                                                                                                                                                                                                                                                        |
|--------------------------------------------------------------------------------------------------------------------------------------------------------------------------|--------------------------------------------------------|-----------------------------------------------------|-------------------------------------------------------------------------------------------------------------------------------------------------------------------------------------------------------------------------------------------------------------------------|
| "Encourage low income residents who are claiming either Working Tax Credit, Child Tax Credit or Universal Credit, to save by promoting the Help to Save savings account" | Blackpool: Financial Inclusion Strategy                | Yes - RQ1, RQ3/RQ4                                  | This data meets all the criteria for RQ1 and RQ3/4 as it is describing a relevant behaviour that is the target of intervention and also describes the intervention.                                                                                                     |
| "It is the responsibility of the tenant to pay their rent and charges on time even if they are in receipt of benefits."                                                  | East Devon: Income management strategy                 | Yes – RQ1                                           | This data is describing a behaviour that is relevant to the behaviours of interest (paying bills).                                                                                                                                                                      |
| "Provide and promote the tools necessary for residents to check and claim the full range of support available to them."                                                  | Maidstone: Financial Inclusion strategy                | Yes – RQ1, RQ3/RQ4                                  | The data is describing a behaviour ("residents to check.") that is relevant to a behaviour of interest and is the target of an intervention. It also describes the intervention "(Provide and promote the tools..")                                                     |
| "Improve training and support to help people develop budgeting skills to avoid increasing debt in the future."                                                           | Wokingham: Anti-Poverty Strategy                       | Yes – RQ3/RQ4                                       | This data describes an intervention aiming to change the resident's behaviour. The intervention was judged to be linked to one of the behaviours of interest (paying bills). In this instance, budgeting skills are closely related to being able to pay bills on time. |
| "Where adults do not possess the basic skills of money management to help them avoid getting into debt or being misled on money matters."                                | East Riding of Yorkshire: Financial Inclusion Strategy | Yes – RQ2                                           | This data was judged to be describing a barrier (lack of money management skills) that was relevant to one of the behavioural areas of interest (paying bills).                                                                                                         |

| Data fragment                                                                                                                                                                                                                                                 | Strategy                                               | Does it meet extraction criteria for any RQ? | Rationale                                                                                                                                                                                                                                                                                                                   |
|---------------------------------------------------------------------------------------------------------------------------------------------------------------------------------------------------------------------------------------------------------------|--------------------------------------------------------|----------------------------------------------|-----------------------------------------------------------------------------------------------------------------------------------------------------------------------------------------------------------------------------------------------------------------------------------------------------------------------------|
| “Financial exclusion can also be experienced by households in other ways, for example, in the East Riding of Yorkshire, many residents live in rural areas that are not well served by services and facilities commonly associated with financial inclusion.” | East Riding of Yorkshire: Financial Inclusion Strategy | No                                           | This data was judged to contain a behavioural barrier (residents living in rural areas). However, it was not considered specific enough to be associated with any of the behavioural areas of interest.                                                                                                                     |
| “Encourage residents to purchase necessary insurance by promoting the benefits of the different types of insurance e.g. home insurance, life insurance, income protection insurance etc”                                                                      | Blackpool: Financial Inclusion Strategy                | No                                           | This data was judged as behaviourally relevant as it was describing a target behaviour of an intervention. However, the behaviour 'residents to purchase necessary insurance' was not judged to be associated with any of the three behavioural areas of interest.                                                          |
| “Whilst the majority of tenants pay their rent on time, it is important we understand the reasons why tenants fall into rent arrears and where possible help them to manage their money and prioritise”                                                       | Dacorum: Housing income management strategy            | No                                           | This data was deemed to be describing a behaviour ("tenants pay their rent on time") and was linked to a behavioural area of interest (paying bills on time). However, it was judged to be describing the general context in which tenants pay their rent rather than as a target behaviour of a behaviour change strategy. |
| "Emergency support can be provided to help with daily living costs, housing-related costs and household items."                                                                                                                                               | East Riding of Yorkshire: Financial Inclusion Strategy | No                                           | This data was judged to be describing an intervention but was not judged to be explicitly referring to a behaviour change intervention. There was also not a clear connection to any of the behavioural areas of interest.                                                                                                  |
| “Improve digital access through the development of digital skills and confidence, whilst ensuring that digital products and services meet the needs of residents”                                                                                             | East Riding of Yorkshire: Financial Inclusion Strategy | No                                           | This data was judged to be describing a behaviour change intervention. However, there was not a clear connection to one of the behavioural areas of interest.                                                                                                                                                               |

| Data fragment                                                                      | Strategy                                                | Does it meet extraction criteria for any RQ? | Rationale                                                                                                                                                                                                                                                                                                                                                                                                                                         |
|------------------------------------------------------------------------------------|---------------------------------------------------------|----------------------------------------------|---------------------------------------------------------------------------------------------------------------------------------------------------------------------------------------------------------------------------------------------------------------------------------------------------------------------------------------------------------------------------------------------------------------------------------------------------|
| “Continue to deliver the “Warmer Winter” project with First Days and Share.”       | Wokingham: Anti-Poverty Strategy                        | No                                           | This data was judged to be describing an intervention. However, there was no further explanation given regarding the "Warmer Winter" project. Data that did not explicitly describe the intervention or project being delivered was not considered relevant and not extracted.                                                                                                                                                                    |
| “Agree negotiated payments based on the tenants income and reasonable expenditure” | Hinckley and Bosworth: Rent arrears and Recovery Policy | No                                           | This data was describing an intervention to recover rent arrears. Although closely linked to one of the behavioural areas of interest (paying bills on time), intervention aimed at the recovery arrears was not extracted. This is because the recovery of arrears and debt management behaviours was deemed to be contextual different to the three healthy financial behaviours of interest that could prevent situations of debt and arrears. |
